## CASE REPORTS

## References

1. Suen HC, Mathisen DJ, Grillo HC, LeBlanc J, McCloud TC, Moncure AC, Hilgenberg AD: Surgical management and radiological characteristics of bronchogenic cysts. *Ann Thorac Surg* 1993; 55:476-81
2. Ramenofsky ML, Leape LL, McCauley RG: Bronchogenic cyst. *J Pediatr Surg* 1979; 14:219-24
3. Di Lorenzo M, Collin PP, Vaillancourt R, Duranceau A: Bronchogenic cysts. *J Pediatr Surg* 1989; 24:988-91
4. Kravitz RM: Congenital malformations of the lung. *Pediatr Clin North Am* 1994; 41:453-72
5. Birmingham PK, Uejima T, Luck SR: Anesthetic management of the patient with a bronchogenic cyst: a review of 24 cases. *Anesth Analg* 1993; 76:879-83
6. De Nunzio MC, Evans AJ: Case report: the computed tomographic features of mediastinal bronchogenic cyst rupture into the bronchial tree. *Br J Radiol* 1994; 67:589-90
7. Neilson IR, Russo P, Laberge JM, Filiatrault D, Nguyen LT, Collin PP, Guttman FM: Congenital adenomatoid malformation of the lung: current management and prognosis. *J Pediatr Surg* 1991; 26:975-81
8. Webb WR: High-resolution computed tomography of the lung: normal and abnormal anatomy. *Semin Roentgenol* 1991; 26:110-7
9. Benumof J: Anesthesia for pediatric thoracic surgery. *Anesthesia for Thoracic Surgery*, 2nd Edition. Edited by Benumof J. Philadelphia, WB Saunders, 1995, pp 657-95
10. Rivero HJ, Young LW: Radiological case of the month. Bronchogenic cyst infected with *Haemophilus influenzae*. *Am J Dis Child* 1988; 142:547-8

Anesthesiology  
1997; 87:696-8

© 1997 American Society of Anesthesiologists, Inc.  
Lippincott-Raven Publishers

## Acute Bronchospasm Associated with Polymethylmethacrylate Cement

Hak Y. Wong, M.B.B.S.,\* Mladen I. Vidovich, M.D.†

Polymethylmethacrylate bone cement is widely used in prosthetic joint implantation surgery and repair of bony defects. Well-recognized complications are most frequently seen during prosthetic joint implantation. We describe a patient who developed acute bronchospasm on application of polymethylmethacrylate during cranioplasty.

### Case Report

A 71-yr-old, 65-kg, woman was to undergo cranioplasty to repair a 4 × 2 cm bony defect of the left temporal fossa left by clipping of internal carotid and ophthalmic artery aneurysms 9 months previously. She suffered no neurologic sequelae from the surgery. Her medical history was otherwise significant only for hypertension controlled with captopril. She reported an allergy to penicillin. She used no tobacco or alcohol. Physical examination was unremarkable.

\* Assistant Professor of Anesthesiology.

† Anesthesiology Resident.

Received from the Department of Anesthesiology, Northwestern University Medical School, Chicago, Illinois. Submitted for publication December 13, 1996. Accepted for publication April 25, 1997.

Address reprint requests to Dr. Wong: Department of Anesthesiology, Passavant Pavilion, Suite 360, 303 East Superior Street, Chicago, Illinois 60611-3053. Address electronic mail to: h-wong@nwu.edu

Key words: bronchospasm, cranioplasty, methylmethacrylate.

Just before induction of anesthesia, vancomycin and gentamicin were given without incident. The American Society of Anesthesiologists' standard monitors were used, along with airway pressure and volume monitors. Anesthesia was induced with thiopental and fentanyl, and muscle relaxation was attained with vecuronium. Proper placement of an 8.0-mm inner diameter cuffed oral endotracheal tube was confirmed by auscultation of bilateral, equal breath sounds, and positive end-tidal CO<sub>2</sub>. Anesthesia was maintained with isoflurane (0.2%-1.5% end-tidal concentration) in 66% N<sub>2</sub>O and 33% O<sub>2</sub> (adult circle circuit; total fresh gas flow 1.5-2 l/min). Mechanical ventilation by a Dräger AV-2 ventilator (North American Dräger, Telford, PA) was adjusted to maintain end-tidal CO<sub>2</sub> between 30 and 36 mmHg. Patient was in supine position, with head slightly turned to the right.

The patient's hemodynamic and respiratory parameters remained stable for the first 2 h of the procedure, during which the skull defect was exposed, with minimal blood loss. One minute after application of semi-solid polymethylmethacrylate on a steel-wire mesh spanning the bony defect, pulse oximetry reading (SaO<sub>2</sub>) decreased from 99% to 89% (fig. 1B); heart rate increased from 62 to 85 beats/min, and blood pressure decreased from 110/65 to 80/50 mmHg (fig. 1A). Simultaneously, airway pressures abruptly increased from 32/22 cmH<sub>2</sub>O (peak/plateau) to 40/32 cmH<sub>2</sub>O (fig. 1C). The capnograph exhibited an upsloping plateau, and the end-tidal CO<sub>2</sub> decreased from 36 to 28 mmHg. Anterior chest auscultation confirmed presence of bilateral, equal breath sounds. In addition, diffuse high-pitch expiratory wheezes were heard. The blood pressure returned to baseline within 10 min after ephedrine, 5 mg, was given intravenously. Inspired oxygen concentration was increased to 100%, and positive end-expiratory pressure (PEEP) of 5 cmH<sub>2</sub>O was added. With these maneuvers, SaO<sub>2</sub> improved from 89% to 92% over 5 min, but wheez-



## CASE REPORTS

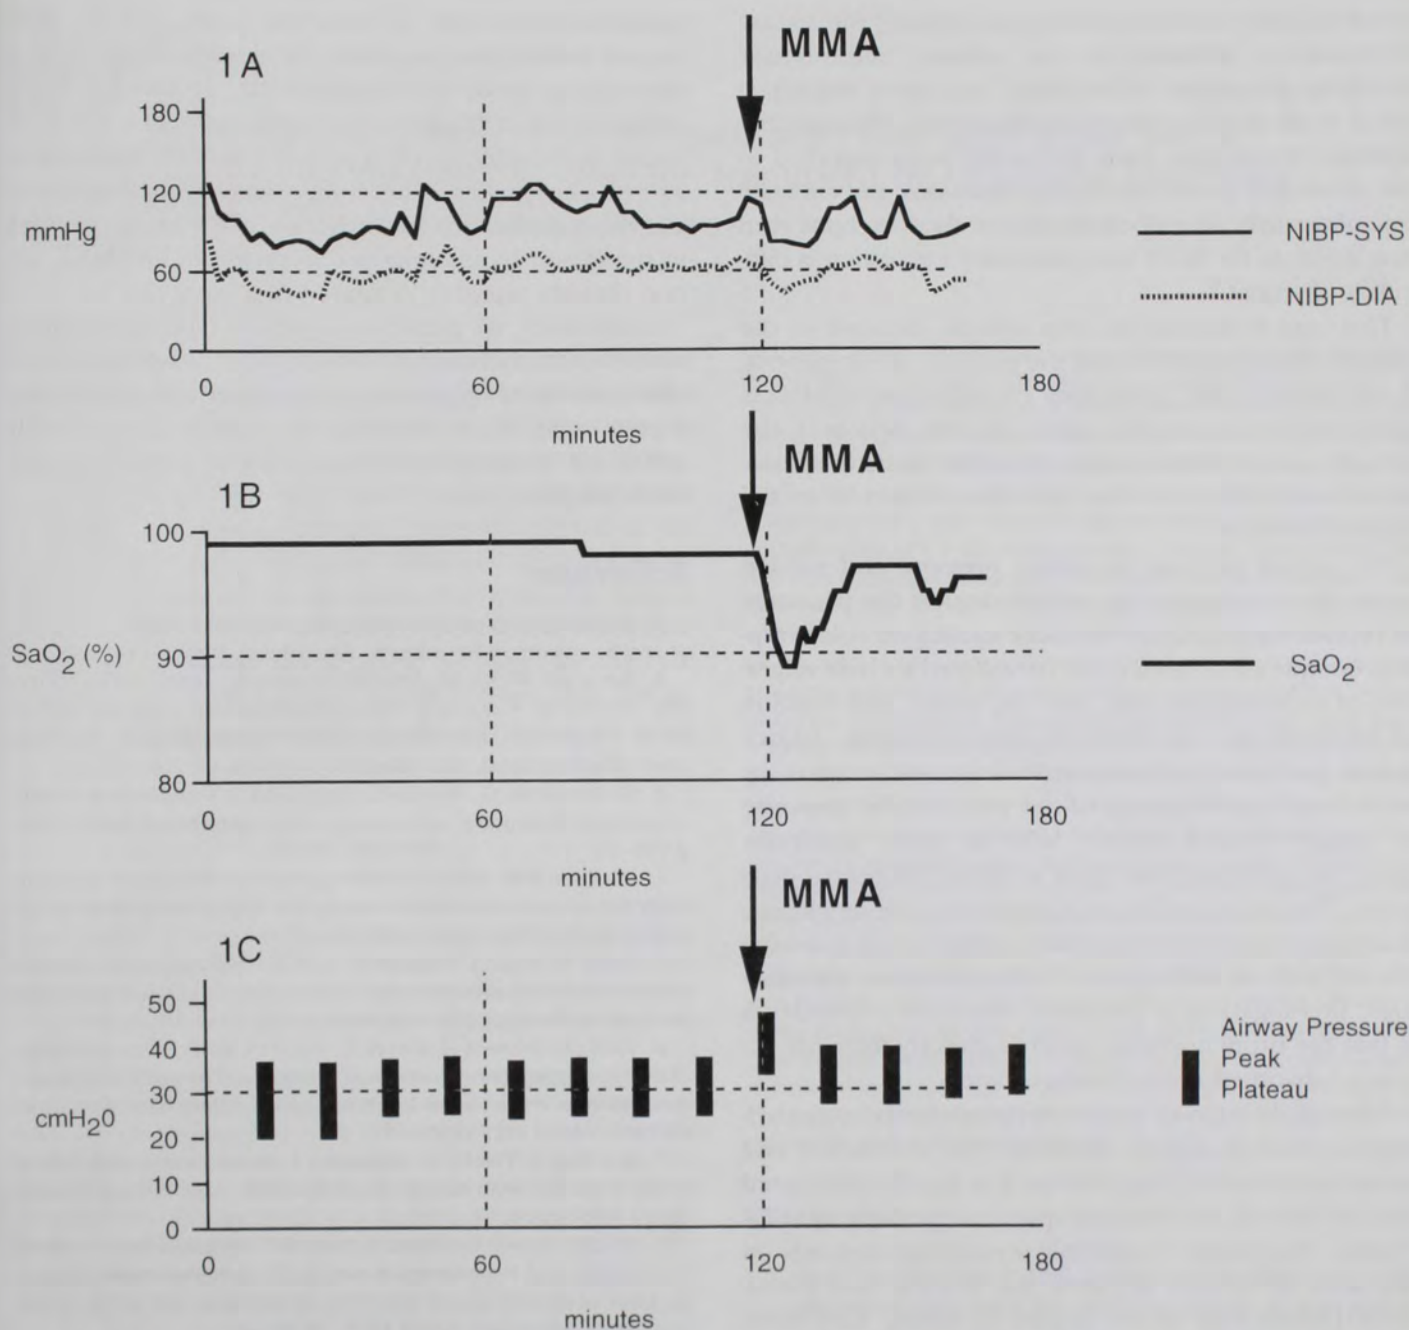

**Fig 1.** A, Changes in systolic (NIBP-SYS) and diastolic (NIBP-DIA) blood pressure. B, Changes in pulse oximetry reading (SaO<sub>2</sub>). C, Changes in peak and plateau airway pressure. Large arrow and MMA indicate polymethylmethacrylate bone cement application.

ing persisted. Five puffs of nebulized albuterol (90  $\mu$ g/puff) were then given through the endotracheal tube, and within 1 min the expiratory wheezes completely resolved; the airway pressure returned to baseline level, and SaO<sub>2</sub> increased to 97%. Anesthesia was continued with isoflurane in 100% O<sub>2</sub>, and surgery was completed without further events. At the end of the 5-h procedure, the patient awoke easily, and the trachea was extubated. Subsequent hospital course and recovery were unremarkable.

## Discussion

Polymethylmethacrylate bone cement is a two-component polymer formed by mixing highly volatile liquid methylmethacrylate monomer, an accelerator, and polymethylmethacrylate powder. Multiple adverse effects have been associated with its use.<sup>1-3</sup> The putative mecha-



## CASE REPORTS

nisms of injury include a neurogenic reflex,<sup>4</sup> the release of vasoactive substance by the cement,<sup>5</sup> intravascular thrombin generation in the lungs,<sup>6</sup> and direct vasoactive effect from absorbed methylmethacrylate.<sup>7</sup> Because the adverse effects have most frequently been observed in the context of prosthetic hip implantations, the etiologic role of tissue or air embolization from the long bone marrow cavity to the heart and pulmonary circulation is difficult to discount.<sup>8</sup>

This case is unusual in two aspects. Because of the nature of the procedure and the position of the patient, it was unlikely that pulmonary embolization of particulate matter or air played a significant role. Secondly, the patient also exhibited acute reversible bronchospasm, an adverse effect that has not been reported in the clinical literature.

The abrupt increase in airway pressure and sudden onset of wheezing in this patient suggest the presence of bronchospasm. Other possible causes for this symptom complex that need to be considered include migration of endotracheal tube onto the carina, mobilization of tracheobronchial secretion, pneumothorax, coincidental pulmonary thromboembolism, and venous air embolism. Rapid clearing of the wheezing in response to inhaled bronchodilator, without other manipulations, helped to exclude most of these differential diagnoses. The trigger of bronchospasm may be an allergic reaction to methylmethacrylate, which cannot be excluded without subsequent challenge test or immunologic investigation. A plausible alternative explanation is that the bronchospasm resulted directly from the action of absorbed methylmethacrylate.

After application of polymethylmethacrylate, methylmethacrylate is rapidly absorbed into circulation and transported to the lungs, where it is rapidly eliminated into the alveoli, its level in expired air peaking after 2–5 min. The extent of systemic absorption depends on the area of contact between the cement and vascularized tissue and on the degree of curing. Low fresh gas flow and rebreathing of exhaled gases in a circle circuit probably prolong the exposure of the patient's lungs to methylmethacrylate. The direct pulmonary effect of methylmethacrylate in the absence of pulmonary embolization is neither well defined nor well known. There is indirect evidence suggesting that it may trigger

bronchoconstriction. In workers subjected to prolonged inhalational exposure, reversible small airway obstruction could be demonstrated.<sup>9</sup> It also has been implicated as a trigger of occupational asthma.<sup>10</sup> It is therefore possible that this patient's bronchospasm was a result of exposure of her lungs to methylmethacrylate, and this together with vasodilation in the lungs resulted in significant hypoxemia and decrease in end-tidal carbon dioxide tension (increased dead space).

In summary, we presented a patient with no previous history of bronchospastic disease who developed bronchospasm after application of polymethylmethacrylate during cranioplasty. She was successfully treated with nebulized albuterol with immediate resolution of the bronchospasm.

## References

1. Duncan JAT: Intra-operative collapse or death related to the use of acrylic cement in hip surgery. *Anaesthesia* 1989; 44:149–53
2. Ereth MH, Weber JG, Abel MD, Lennon RL, Lewallen DG, Ilstrup DM, Rehder K: Cemented versus noncemented total hip arthroplasty—Embolism, hemodynamics, and intrapulmonary shunting. *Mayo Clin Proc* 1992; 67:1066–74
3. Hedenstierna G, Mebius C, Bygdeman S: Ventilation-perfusion relationship during hip arthroplasty. *Acta Anaesthesiol Scand* 1983; 27:56–61
4. Rudigier JFM, Ritter G: Pathogenesis of circulatory reactions triggered by nervous reflexes during the implantation of bone cements. *Res Exp Med (Berl)* 1983; 183:77–94
5. Tryba M, Linde I, Voshage G, Zenz M: Histaminfreisetzung und kardiovaskuläre Reaktionen nach Implantation von Knochenzement bei totalem Hüftgelenkersatz. *Anaesthesist* 1991; 40:25–32
6. Dahl OE, Johnsen H, Kierulf P, Molnar I, Ro JS, Vinje A, Mowinkel P: Intrapulmonary thrombin generation and its relation to monomethylmethacrylate plasma levels during hip arthroplasty. *Acta Anaesthesiol Scand* 1992; 36:331–5
7. Svartling N, Pfaffli P, Tarkkanen L: Methylmethacrylate blood levels in patient with femoral neck fractures. *Arch Orthop Trauma Surg* 1985; 104:242–6
8. Modig J, Busch C, Olerud S, Saldeen T, Waernbaum G: Arterial hypotension and hypoxaemia during total hip replacement: The importance of thromboplastic products, fat embolism and acrylic monomers. *Acta Anaesthesiol Scand* 1975; 19:28–43
9. Marez T, Edme JL, Boulenguez C, Shirali P, Haguenoer JM: Bronchial symptoms and respiratory function in workers exposed to methylmethacrylate. *Br J Ind Med* 1993; 50:894–7
10. Lozewicz S, Davison AG, Hopkirk A, Burge PS, Boldy DAR, Riordan JF, McGivern DV, Platts BW, Davies D, Newman-Taylor AJ: Occupational asthma due to methyl methacrylate and cyanoacrylates. *Thorax* 1985; 40:836–9
